# Supplementary material for: The Holocene History of the Diatom Community in a Small Water Body on Shemya Island (Aleutian Arc, USA): The Influence of Global and Local Environmental Changes
Source: MDPI journal article supplement (doi:10.3390/w13213134), 2021-11-07
Supplement: s1 [file s1]

**Table S1.** Information for the combined layers of McDonald Point peat deposition included in the analysis. Based on [8, 46].

| Layer Number | Layer, cm | Depth, cm | Age (cal. yrs BP) | $\delta^{15}\text{N}$ , ‰ | Degree of Decomposition of Plant Material, % |
|--------------|-----------|-----------|-------------------|---------------------------|----------------------------------------------|
| 1            | 0-3       | 1.5       | 16                | 2.0                       | NA                                           |
| 2            | 3-6       | 4.5       | 41                | 0.5                       | NA                                           |
| 3            | 65-75     | 70.0      | 678               | 2.7                       | 31.6                                         |
| 4            | 144-164   | 154       | 1993              | 4.1                       | 19.5                                         |
| 5            | 235-240   | 237.5     | 3876              | 14.2                      | 59.9                                         |
| 6            | 240-245   | 242.5     | 3999              | 14.1                      | 51.9                                         |
| 7            | 265-270   | 267.5     | 4756              | 8.2                       | 10.7                                         |
| 8            | 285-296   | 290.5     | 5928              | NA                        | NA                                           |
| 9            | 296-300   | 298.0     | 6283              | 4.7                       | NA                                           |
| 10           | 300-305   | 302.5     | 6544              | NA                        | NA                                           |
| 11           | 305-310   | 307.5     | 6799              | NA                        | 4                                            |
| 12           | 318-320   | 319.0     | 7393              | 0.8                       | 14.6                                         |
| 13           | 320-340   | 330.0     | 7848              | 0.4                       | 13.6                                         |
| 14           | 340-345   | 342.5     | 8358              | 0.0                       | 12.5                                         |
| 15           | 350-360   | 355.0     | 8834              | -0.5                      | 25.7                                         |
| 16           | 360-385   | 372.5     | 9330              | -0.7                      | 16.2                                         |

NA – data not available.

**Table S2.** Information for the layers age carried out using Bchron package for R environment [27,44,45].

| Depth, cm | 2.5%   | 10%  | 50%   | 90%   | 97.5%   |
|-----------|--------|------|-------|-------|---------|
| 0         | -4     | -2   | -1    | 0     | 0.025   |
| 1         | 1      | 3    | 7     | 31.1  | 126.0   |
| 2         | 3      | 7    | 16    | 62    | 190.025 |
| 3         | 5.975  | 11   | 24    | 89    | 218.1   |
| 4         | 8      | 15   | 33    | 110.5 | 244.125 |
| 5         | 10     | 19   | 41    | 128   | 254.075 |
| 6         | 12     | 23   | 50    | 145   | 261.125 |
| 7         | 14     | 27   | 58    | 163   | 265.15  |
| 8         | 17     | 31   | 66    | 175   | 270.075 |
| 9         | 19     | 34.9 | 75    | 186   |         |
| 10        | 21     | 39   | 83    | 194.2 | 275.075 |
| 11        | 23     | 43   | 91    | 206.1 | 287.05  |
| 12        | 25     | 46.9 | 99    | 214.1 | 294.0   |
| 13        | 28.975 | 50   | 108   | 221.1 | 305.025 |
| 14        | 32.925 | 54.9 | 116   | 231   | 309.025 |
| 15        | 34.925 | 59   | 124   | 240.1 | 314.05  |
| 16        | 37.9   | 63.9 | 132   | 247.1 | 320.1   |
| 17        | 40.875 | 67.9 | 140   | 252.1 | 327.075 |
| 18        | 41.925 | 72   | 148   | 258.1 | 336.05  |
| 19        | 42.95  | 76   | 156   | 266   | 347.025 |
| 20        | 43.975 | 80   | 164.5 | 273.1 | 352.025 |
| 21        | 45     | 84   | 173   | 278.1 | 357.025 |
| 22        | 52.875 | 89.9 | 181   | 286.2 | 362.0   |
| 23        | 55.85  | 95   | 189   | 293   | 366.025 |

---

|    |         |       |       |       |         |
|----|---------|-------|-------|-------|---------|
| 24 | 57.875  | 99    | 197   | 303.1 | 373.025 |
| 25 | 59.975  | 104   | 206   | 308   | 380.025 |
| 26 | 63.925  | 108   | 214   | 314.1 | 383.025 |
| 27 | 67      | 112   | 222   | 323   | 391.025 |
| 28 | 69.975  | 116   | 230   | 328   | 393.1   |
| 29 | 73      | 121.9 | 238   | 335.1 | 400.025 |
| 30 | 77.95   | 125.9 | 246.5 | 340.1 | 405.05  |
| 31 | 84      | 132   | 254   | 345   | 416.025 |
| 32 | 87.975  | 138   | 262   | 353   | 421.025 |
| 33 | 90.975  | 145.8 | 269   | 358   | 428.0   |
| 34 | 95      | 153.9 | 276   | 367   | 430.1   |
| 35 | 101.925 | 157.8 | 283.5 | 375   | 436.025 |
| 36 | 107     | 166.9 | 291   | 383.1 | 444.025 |
| 37 | 112     | 174.9 | 299   | 394   | 452.075 |
| 38 | 114.95  | 181.9 | 306   | 401   | 462.025 |
| 39 | 117.925 | 191.9 | 314   | 409   | 470.0   |
| 40 | 124     | 203   | 322   | 419.1 | 474.025 |
| 41 | 127     | 210.9 | 330   | 429   | 481.0   |
| 42 | 132.95  | 224   | 337.5 | 437.1 | 483.05  |
| 43 | 142.9   | 236   | 346   | 446   | 485.1   |
| 44 | 148     | 247.9 | 354   | 452.1 | 493.0   |
| 45 | 161.925 | 257.9 | 363   | 461   | 500.0   |
| 46 | 178.9   | 269.9 | 375   | 471   | 504.15  |
| 47 | 199.975 | 282   | 385   | 481.1 | 512.075 |
| 48 | 220.875 | 296   | 397   | 492   | 521.025 |
| 49 | 253.975 | 308.9 | 409   | 506   | 532.0   |
| 50 | 273.95  | 319.9 | 421   | 518.2 | 560.025 |
| 51 | 293.975 | 334   | 436   | 533   | 597.025 |
| 52 | 309.975 | 348   | 453   | 547   | 619.125 |
| 53 | 326.95  | 365   | 469   | 561   | 629.1   |
| 54 | 342     | 380.9 | 482   | 573.1 | 652.025 |
| 55 | 355     | 392   | 494   | 588   | 660.025 |
| 56 | 363     | 408   | 506   | 604   | 669.05  |
| 57 | 374.925 | 421   | 519   | 617   | 685.0   |
| 58 | 384     | 433   | 531   | 627   | 696.025 |
| 59 | 397     | 447   | 545   | 637.1 | 706.05  |
| 60 | 408.925 | 460   | 557.5 | 651   | 713.025 |
| 61 | 417.95  | 473   | 571   | 662   | 721.0   |
| 62 | 425     | 484   | 582   | 674   | 729.05  |
| 63 | 432.975 | 495   | 594   | 685   | 740.025 |
| 64 | 439.975 | 506.9 | 606   | 698.1 | 747.125 |
| 65 | 446.975 | 517.9 | 620   | 712   | 754.05  |
| 66 | 454.975 | 530.9 | 632   | 724   | 763.075 |
| 67 | 462.975 | 543.9 | 643.5 | 735   | 776.025 |
| 68 | 470     | 554   | 655   | 746   | 784.025 |
| 69 | 481     | 563   | 666.5 | 758   | 794.0   |
| 70 | 494.875 | 574.9 | 678   | 769   | 801.0   |
| 71 | 498.975 | 585.9 | 690   | 781   | 807.0   |
| 72 | 507.95  | 596.9 | 702   | 793   | 817.05  |

---

---

|     |          |        |        |        |          |
|-----|----------|--------|--------|--------|----------|
| 73  | 515.95   | 608.9  | 715    | 806    | 826.025  |
| 74  | 531.95   | 626    | 727    | 819    | 836.075  |
| 75  | 546.925  | 643    | 740    | 833    | 850.05   |
| 76  | 556.95   | 658    | 754.5  | 846.1  | 863.0    |
| 77  | 581.975  | 674    | 768    | 862    | 875.025  |
| 78  | 598.95   | 687    | 781    | 878    | 889.0    |
| 79  | 647.875  | 700    | 797    | 895    | 905.0    |
| 80  | 672.975  | 715    | 813    | 909    | 927.0    |
| 81  | 696      | 733    | 829    | 924    | 946.075  |
| 82  | 711      | 753    | 845    | 938    | 978.1    |
| 83  | 723.975  | 763    | 857    | 955    | 1028.15  |
| 84  | 737.95   | 776    | 871    | 969    | 1076.325 |
| 85  | 748      | 787    | 882.5  | 986    | 1115.025 |
| 86  | 759      | 798.9  | 895    | 1003.1 | 1132.075 |
| 87  | 767      | 806.9  | 906    | 1019.2 | 1149.05  |
| 88  | 777.975  | 819    | 915    | 1034   | 1169.025 |
| 89  | 789      | 828    | 925    | 1053   | 1181.05  |
| 90  | 798.975  | 839.9  | 935    | 1072   | 1194.05  |
| 91  | 805.95   | 848.9  | 947    | 1082.4 | 1205.025 |
| 92  | 813.925  | 858    | 957    | 1099.3 | 1216.025 |
| 93  | 819.95   | 866    | 969    | 1112   | 1222.05  |
| 94  | 825.975  | 874.9  | 980    | 1120.1 | 1231.025 |
| 95  | 830      | 882    | 992    | 1131.1 | 1240.025 |
| 96  | 832.95   | 889    | 1003   | 1141   | 1248.025 |
| 97  | 836.95   | 897.9  | 1015   | 1149   | 1262.075 |
| 98  | 845.95   | 905    | 1026   | 1161.1 | 1268.0   |
| 99  | 851.925  | 910    | 1037   | 1170   | 1271.075 |
| 100 | 855.925  | 916    | 1048   | 1180.1 | 1283.0   |
| 101 | 861.925  | 923.9  | 1058.5 | 1189   | 1288.075 |
| 102 | 866.875  | 931    | 1069   | 1196   | 1297.025 |
| 103 | 871.9    | 941.9  | 1080   | 1205.1 | 1298.15  |
| 104 | 883.825  | 949.9  | 1091.5 | 1216   | 1303.1   |
| 105 | 889.8    | 958    | 1103   | 1228   | 1311.025 |
| 106 | 895.95   | 967    | 1113   | 1236.1 | 1316.05  |
| 107 | 897.975  | 976    | 1125   | 1246.1 | 1323.025 |
| 108 | 904      | 986    | 1136   | 1259.1 | 1328.05  |
| 109 | 910.95   | 992.9  | 1146   | 1268.1 | 1331.15  |
| 110 | 915.875  | 1000.9 | 1157   | 1278.1 | 1342.125 |
| 111 | 923.95   | 1011.9 | 1169   | 1288.1 | 1356.025 |
| 112 | 930      | 1022   | 1181   | 1299.1 | 1363.025 |
| 113 | 940.95   | 1033.9 | 1192   | 1309   | 1371.025 |
| 114 | 952.975  | 1046   | 1202   | 1318   | 1380.05  |
| 115 | 962.975  | 1056   | 1212.5 | 1330   | 1389.025 |
| 116 | 970      | 1068.6 | 1223   | 1342   | 1402.0   |
| 117 | 983.875  | 1083   | 1234   | 1354.1 | 1416.0   |
| 118 | 994      | 1090.9 | 1244   | 1368.1 | 1430.0   |
| 119 | 1012.925 | 1101.9 | 1255   | 1384.1 | 1444.0   |
| 120 | 1029     | 1115.9 | 1266.5 | 1398.1 | 1457.0   |
| 121 | 1040.975 | 1133   | 1277.5 | 1413   | 1469.025 |

---

|     |          |        |        |        |          |
|-----|----------|--------|--------|--------|----------|
| 122 | 1056     | 1155   | 1291   | 1429   | 1485.025 |
| 123 | 1076.95  | 1175   | 1305   | 1444   | 1497.075 |
| 124 | 1098.85  | 1192   | 1322.5 | 1467   | 1511.0   |
| 125 | 1122.95  | 1210.9 | 1346   | 1500.1 | 1540.075 |
| 126 | 1160.925 | 1235   | 1368.5 | 1543.4 | 1637.175 |
| 127 | 1177.975 | 1260   | 1395   | 1599.1 | 1790.05  |
| 128 | 1205.975 | 1282   | 1423.5 | 1666.5 | 1927.375 |
| 129 | 1232.925 | 1306.8 | 1446   | 1735.3 | 2009.9   |
| 130 | 1248.975 | 1324   | 1469.5 | 1802.1 | 2142.0   |
| 131 | 1266.95  | 1340   | 1492.5 | 1866   | 2199.2   |
| 132 | 1281.825 | 1358.9 | 1519   | 1920.3 | 2253.025 |
| 133 | 1296.95  | 1373.9 | 1539   | 1975.1 | 2276.175 |
| 134 | 1309.85  | 1387.9 | 1563.5 | 2008.1 | 2334.075 |
| 135 | 1323.85  | 1402   | 1587.5 | 2059.3 | 2362.375 |
| 136 | 1339.95  | 1417   | 1609.5 | 2092.1 | 2421.15  |
| 137 | 1351.95  | 1432   | 1631   | 2142.2 | 2451.175 |
| 138 | 1363.9   | 1450.8 | 1651.5 | 2177.2 | 2501.15  |
| 139 | 1371.925 | 1460   | 1674   | 2203   | 2518.05  |
| 140 | 1383.925 | 1474.9 | 1693.5 | 2235   | 2537.85  |
| 141 | 1391.95  | 1488.8 | 1716.5 | 2266.3 | 2583.35  |
| 142 | 1400.95  | 1498   | 1738.5 | 2294   | 2611.85  |
| 143 | 1408.975 | 1510.8 | 1758.5 | 2323.1 | 2668.025 |
| 144 | 1417.95  | 1519   | 1778.5 | 2346.4 | 2680.175 |
| 145 | 1426.975 | 1532   | 1798.5 | 2360   | 2704.75  |
| 146 | 1435     | 1545   | 1821.5 | 2393.3 | 2752.125 |
| 147 | 1443     | 1556.9 | 1845.5 | 2420.9 | 2772.1   |
| 148 | 1452.975 | 1566.7 | 1868   | 2442.4 | 2786.1   |
| 149 | 1462.95  | 1576.8 | 1885.5 | 2455.2 | 2803.5   |
| 150 | 1471.925 | 1590.7 | 1905.5 | 2472.5 | 2834.0   |
| 151 | 1477.975 | 1598.9 | 1927   | 2494.1 | 2845.025 |
| 152 | 1486     | 1608.9 | 1949.5 | 2509.2 | 2855.025 |
| 153 | 1493.95  | 1618.9 | 1971   | 2534.1 | 2865.025 |
| 154 | 1498     | 1635.9 | 1993   | 2548.2 | 2875.025 |
| 155 | 1507.925 | 1645   | 2015.5 | 2562.9 | 2896.025 |
| 156 | 1517.85  | 1653.9 | 2035.5 | 2589.1 | 2908.05  |
| 157 | 1523.9   | 1664.7 | 2058   | 2616.1 | 2920.525 |
| 158 | 1528.975 | 1675.8 | 2074.5 | 2628.9 | 2944.05  |
| 159 | 1539.925 | 1689.6 | 2094.5 | 2651.1 | 2950.425 |
| 160 | 1551.875 | 1703   | 2115.5 | 2665.1 | 2980.0   |
| 161 | 1563.95  | 1714   | 2138.5 | 2689.1 | 2988.15  |
| 162 | 1570.925 | 1724.8 | 2159   | 2716.1 | 2997.35  |
| 163 | 1575.875 | 1734   | 2178   | 2736.2 | 3019.325 |
| 164 | 1578.975 | 1747.6 | 2197.5 | 2756.6 | 3026.4   |
| 165 | 1587.9   | 1754.9 | 2218   | 2774.5 | 3033.475 |
| 166 | 1600.875 | 1774.8 | 2237.5 | 2788.2 | 3045.425 |
| 167 | 1610.925 | 1787.8 | 2256.5 | 2815.2 | 3073.025 |
| 168 | 1617.925 | 1793.9 | 2280   | 2832   | 3090.325 |
| 169 | 1628.875 | 1812.8 | 2299.5 | 2846.2 | 3099.2   |
| 170 | 1634.875 | 1822.9 | 2323.5 | 2862.1 | 3108.025 |

|     |          |        |        |        |          |
|-----|----------|--------|--------|--------|----------|
| 171 | 1640.925 | 1833   | 2346.5 | 2877.2 | 3117.05  |
| 172 | 1649.925 | 1850   | 2368   | 2889.2 | 3126.45  |
| 173 | 1656     | 1864.7 | 2390.5 | 2902.1 | 3134.425 |
| 174 | 1665.925 | 1879.8 | 2409.5 | 2911.1 | 3158.275 |
| 175 | 1679     | 1900.4 | 2431   | 2930.2 | 3170.175 |
| 176 | 1695.85  | 1915.8 | 2450   | 2946.5 | 3183.125 |
| 177 | 1703.85  | 1932.4 | 2472.5 | 2979.1 | 3189.15  |
| 178 | 1713.975 | 1946.8 | 2495   | 2995.2 | 3196.1   |
| 179 | 1722     | 1960.8 | 2519.5 | 3008.1 | 3205.175 |
| 180 | 1733     | 1976.3 | 2538.5 | 3023   | 3218.0   |
| 181 | 1746.975 | 1985.5 | 2560   | 3031.1 | 3224.175 |
| 182 | 1758.925 | 2010.5 | 2584   | 3041.3 | 3230.225 |
| 183 | 1765.975 | 2029.3 | 2604.5 | 3053.2 | 3236.225 |
| 184 | 1773.9   | 2047.9 | 2627.5 | 3066.1 | 3244.175 |
| 185 | 1781.975 | 2065.4 | 2649   | 3079.1 | 3254.075 |
| 186 | 1789     | 2076   | 2670   | 3091   | 3263.025 |
| 187 | 1796.95  | 2088.9 | 2691.5 | 3103   | 3269.05  |
| 188 | 1807.925 | 2106.4 | 2713.5 | 3116.1 | 3276.025 |
| 189 | 1828.7   | 2121.7 | 2734.5 | 3133.5 | 3285.05  |
| 190 | 1847.725 | 2137   | 2756.5 | 3147.1 | 3295.225 |
| 191 | 1854.725 | 2150.6 | 2776.5 | 3156   | 3304.25  |
| 192 | 1882.5   | 2179.9 | 2801   | 3171.2 | 3320.125 |
| 193 | 1890.5   | 2192   | 2823   | 3184   | 3323.275 |
| 194 | 1910.9   | 2200   | 2845   | 3205.1 | 3332.2   |
| 195 | 1933.95  | 2219.3 | 2864.5 | 3216   | 3345.0   |
| 196 | 1942.875 | 2233.9 | 2886   | 3231   | 3357.15  |
| 197 | 1950.825 | 2250.9 | 2907   | 3246.2 | 3367.05  |
| 198 | 1960.9   | 2269   | 2927   | 3263.1 | 3376.025 |
| 199 | 1987.95  | 2290.6 | 2948.5 | 3281   | 3383.1   |
| 200 | 2005.75  | 2318.3 | 2970.5 | 3292   | 3394.025 |
| 201 | 2019.9   | 2338.8 | 2990   | 3303.1 | 3406.125 |
| 202 | 2053.925 | 2367.9 | 3015   | 3313.3 | 3417.1   |
| 203 | 2094.225 | 2396   | 3034.5 | 3323   | 3428.05  |
| 204 | 2105.9   | 2423.8 | 3055.5 | 3330.3 | 3439.025 |
| 205 | 2136.6   | 2449.8 | 3077   | 3343.1 | 3451.1   |
| 206 | 2163.55  | 2468.6 | 3097.5 | 3353.5 | 3462.075 |
| 207 | 2184.7   | 2491   | 3118   | 3367.1 | 3474.0   |
| 208 | 2224.275 | 2520.6 | 3139   | 3384.1 | 3484.025 |
| 209 | 2248.85  | 2540.9 | 3158   | 3397.2 | 3496.0   |
| 210 | 2266.95  | 2594.8 | 3179.5 | 3411   | 3503.025 |
| 211 | 2298.975 | 2619.8 | 3198.5 | 3422   | 3510.0   |
| 212 | 2323.825 | 2652.3 | 3223   | 3433.2 | 3516.125 |
| 213 | 2350.65  | 2681.9 | 3242   | 3449.1 | 3529.025 |
| 214 | 2387.775 | 2719.6 | 3263.5 | 3461   | 3544.025 |
| 215 | 2427.925 | 2770.8 | 3283   | 3478   | 3557.1   |
| 216 | 2515.575 | 2833.5 | 3304   | 3494   | 3572.025 |
| 217 | 2558     | 2885.9 | 3326   | 3506.2 | 3590.025 |
| 218 | 2589.625 | 2941.7 | 3347   | 3527.2 | 3604.0   |
| 219 | 2610.825 | 3006.4 | 3369   | 3544.3 | 3616.025 |

|     |          |        |        |        |          |
|-----|----------|--------|--------|--------|----------|
| 220 | 2643.85  | 3064.6 | 3390   | 3565   | 3627.025 |
| 221 | 2719.725 | 3136.6 | 3414   | 3582   | 3644.025 |
| 222 | 2797.525 | 3197.7 | 3440   | 3606   | 3668.0   |
| 223 | 2942.525 | 3257.6 | 3466   | 3628   | 3681.1   |
| 224 | 3086.975 | 3331   | 3498   | 3657   | 3710.0   |
| 225 | 3169.95  | 3373   | 3528   | 3689   | 3753.125 |
| 226 | 3287     | 3408.9 | 3558   | 3733.1 | 3831.3   |
| 227 | 3372.925 | 3449   | 3591.5 | 3770.1 | 3917.25  |
| 228 | 3403.975 | 3476.9 | 3621.5 | 3815   | 4030.075 |
| 229 | 3440.9   | 3503   | 3648   | 3859.1 | 4068.1   |
| 230 | 3464.875 | 3530.9 | 3674   | 3897   | 4114.05  |
| 231 | 3476.95  | 3557   | 3699   | 3917.4 | 4167.2   |
| 232 | 3487.95  | 3578   | 3722   | 3965.4 | 4226.1   |
| 233 | 3503.975 | 3603.9 | 3748.5 | 3996   | 4243.15  |
| 234 | 3528.925 | 3625.9 | 3775   | 4025   | 4260.05  |
| 235 | 3548.875 | 3647   | 3801   | 4070   | 4277.075 |
| 236 | 3563.95  | 3669   | 3826   | 4092.4 | 4295.125 |
| 237 | 3583.85  | 3685.9 | 3850   | 4121.2 | 4310.05  |
| 238 | 3601.825 | 3706   | 3876   | 4146.2 | 4324.025 |
| 239 | 3614     | 3725.9 | 3902   | 4169.1 | 4346.25  |
| 240 | 3630.925 | 3744.9 | 3929   | 4194.5 | 4381.025 |
| 241 | 3645     | 3761.9 | 3952   | 4216.1 | 4392.075 |
| 242 | 3657.975 | 3777   | 3975   | 4234   | 4412.1   |
| 243 | 3670.925 | 3801   | 3999   | 4259.3 | 4427.0   |
| 244 | 3682.9   | 3820.9 | 4023.5 | 4287.1 | 4436.175 |
| 245 | 3695.95  | 3850.9 | 4051   | 4307.2 | 4453.075 |
| 246 | 3709.9   | 3866.9 | 4077.5 | 4327.1 | 4466.2   |
| 247 | 3717.975 | 3884   | 4104.5 | 4340   | 4486.1   |
| 248 | 3731.925 | 3900.7 | 4128.5 | 4357.1 | 4500.125 |
| 249 | 3739.925 | 3920.7 | 4154   | 4375.3 | 4515.05  |
| 250 | 3751.9   | 3931.8 | 4180   | 4397   | 4531.0   |
| 251 | 3766.925 | 3961   | 4205   | 4416.1 | 4544.05  |
| 252 | 3782.8   | 3991.8 | 4233   | 4432.1 | 4557.025 |
| 253 | 3802.8   | 4014.8 | 4258.5 | 4450.3 | 4566.075 |
| 254 | 3831.55  | 4033.7 | 4284   | 4471   | 4583.025 |
| 255 | 3842.85  | 4049   | 4308.5 | 4493.1 | 4601.0   |
| 256 | 3894.725 | 4076.3 | 4332.5 | 4518.1 | 4614.0   |
| 257 | 3925.8   | 4105.4 | 4357   | 4543.1 | 4628.05  |
| 258 | 3948.975 | 4139   | 4381   | 4573.1 | 4645.025 |
| 259 | 3972.9   | 4184.7 | 4408   | 4599.1 | 4663.0   |
| 260 | 4018.95  | 4228   | 4434   | 4625.1 | 4683.025 |
| 261 | 4055.65  | 4270   | 4462   | 4650   | 4701.125 |
| 262 | 4086     | 4304   | 4487   | 4678.1 | 4723.0   |
| 263 | 4110.85  | 4348.9 | 4521   | 4709.1 | 4745.025 |
| 264 | 4215.825 | 4382.9 | 4558   | 4757   | 4777.075 |
| 265 | 4315.975 | 4426   | 4597.5 | 4815.1 | 4841.075 |
| 266 | 4381.95  | 4464   | 4647.5 | 4907   | 5027.275 |
| 267 | 4438     | 4501   | 4702   | 4993.1 | 5285.375 |
| 268 | 4476.975 | 4554   | 4756   | 5113.2 | 5561.5   |

---

|     |          |        |        |        |          |
|-----|----------|--------|--------|--------|----------|
| 269 | 4515.95  | 4595   | 4806.5 | 5207.5 | 5737.325 |
| 270 | 4536.95  | 4640.9 | 4856   | 5343.7 | 5848.125 |
| 271 | 4563     | 4681   | 4905   | 5453.3 | 5945.975 |
| 272 | 4590     | 4723.9 | 4959   | 5535.5 | 6013.05  |
| 273 | 4610.95  | 4763.9 | 5009   | 5631.5 | 6108.0   |
| 274 | 4632.925 | 4795.9 | 5056.5 | 5678.5 | 6154.5   |
| 275 | 4652     | 4825.9 | 5106   | 5770.7 | 6244.025 |
| 276 | 4670.925 | 4852   | 5155.5 | 5824.7 | 6284.025 |
| 277 | 4691.95  | 4877.9 | 5206   | 5879.2 | 6334.05  |
| 278 | 4714     | 4909.8 | 5259   | 5943.8 | 6387.275 |
| 279 | 4737.9   | 4934.6 | 5310   | 6024.3 | 6461.6   |
| 280 | 4757.875 | 4964.8 | 5361.5 | 6090.1 | 6482.55  |
| 281 | 4779.725 | 4988   | 5415.5 | 6135.2 | 6546.025 |
| 282 | 4800.725 | 5013.8 | 5465.5 | 6181.3 | 6570.025 |
| 283 | 4811.975 | 5042.7 | 5517.5 | 6231.1 | 6601.15  |
| 284 | 4831.975 | 5066   | 5571.5 | 6294.2 | 6622.925 |
| 285 | 4849.85  | 5091   | 5622.5 | 6332.2 | 6683.05  |
| 286 | 4865.85  | 5118.8 | 5673.5 | 6371   | 6709.075 |
| 287 | 4895.8   | 5151.3 | 5725   | 6402.2 | 6732.075 |
| 288 | 4916.875 | 5179.9 | 5776.5 | 6440.1 | 6757.325 |
| 289 | 4937.675 | 5210.9 | 5825.5 | 6479.2 | 6792.075 |
| 290 | 4964.85  | 5240.9 | 5875.5 | 6508.2 | 6811.075 |
| 291 | 4980     | 5279   | 5928   | 6543.1 | 6837.5   |
| 292 | 4997.925 | 5315.8 | 5980   | 6574.4 | 6872.225 |
| 293 | 5013.9   | 5349.6 | 6032   | 6616.2 | 6890.2   |
| 294 | 5030.85  | 5378.8 | 6084   | 6649.1 | 6916.25  |
| 295 | 5072.775 | 5409   | 6133   | 6681.3 | 6943.35  |
| 296 | 5087.95  | 5455.5 | 6186.5 | 6709   | 6969.3   |
| 297 | 5142.3   | 5487.1 | 6234   | 6737.2 | 6995.225 |
| 298 | 5179.75  | 5527.9 | 6283   | 6767.1 | 7018.1   |
| 299 | 5200.85  | 5567   | 6335.5 | 6804.3 | 7031.1   |
| 300 | 5231.75  | 5623.9 | 6388   | 6830.4 | 7053.55  |
| 301 | 5259.4   | 5682.3 | 6437.5 | 6863.1 | 7084.025 |
| 302 | 5281.5   | 5739.4 | 6492   | 6892   | 7099.05  |
| 303 | 5302.95  | 5810.7 | 6544   | 6923.1 | 7110.1   |
| 304 | 5323.775 | 5856.9 | 6595.5 | 6953.2 | 7127.225 |
| 305 | 5337.8   | 5924.6 | 6648   | 6985.3 | 7148.425 |
| 306 | 5361.7   | 5993.7 | 6696.5 | 7023.3 | 7169.325 |
| 307 | 5392.875 | 6025   | 6748   | 7049.1 | 7190.175 |
| 308 | 5458.95  | 6097   | 6799   | 7089.1 | 7212.175 |
| 309 | 5516.65  | 6152.5 | 6849   | 7128.3 | 7232.075 |
| 310 | 5562.7   | 6207.8 | 6898.5 | 7161.2 | 7253.0   |
| 311 | 5631     | 6313.4 | 6947.5 | 7198   | 7279.1   |
| 312 | 5665.85  | 6393   | 6995.5 | 7235.1 | 7315.025 |
| 313 | 5724.775 | 6531.9 | 7045   | 7276.2 | 7347.025 |
| 314 | 5878.725 | 6630.6 | 7096   | 7314.5 | 7386.025 |
| 315 | 5993.65  | 6733.4 | 7148.5 | 7359   | 7418.1   |
| 316 | 6215.575 | 6844.6 | 7202   | 7406.2 | 7465.0   |
| 317 | 6435.375 | 6968.7 | 7263   | 7463.1 | 7517.025 |

---

---

|     |          |        |        |         |           |
|-----|----------|--------|--------|---------|-----------|
| 318 | 6832.9   | 7060   | 7333   | 7533    | 7567.05   |
| 319 | 7009.975 | 7165.4 | 7393   | 7604    | 7646.0    |
| 320 | 7053.9   | 7204   | 7442   | 7691    | 7813.2    |
| 321 | 7085.8   | 7248.8 | 7488   | 7752.4  | 8032.05   |
| 322 | 7101.95  | 7286   | 7532   | 7835.1  | 8208.125  |
| 323 | 7139.925 | 7310   | 7576   | 7913    | 8315.275  |
| 324 | 7157.875 | 7337.9 | 7616.5 | 7988.3  | 8405.575  |
| 325 | 7188.7   | 7364.9 | 7661   | 8070.3  | 8502.475  |
| 326 | 7207.8   | 7393.9 | 7698   | 8126.5  | 8557.2    |
| 327 | 7234.875 | 7427.6 | 7734   | 8184.1  | 8629.575  |
| 328 | 7251.95  | 7447   | 7772   | 8245.2  | 8691.175  |
| 329 | 7273.85  | 7473.9 | 7812.5 | 8323.1  | 8779.125  |
| 330 | 7302.95  | 7495.9 | 7848   | 8369.4  | 8830.2    |
| 331 | 7327.975 | 7521   | 7889.5 | 8410.1  | 8855.6    |
| 332 | 7342.95  | 7545.8 | 7930.5 | 8456.5  | 8928.1    |
| 333 | 7358.875 | 7572.9 | 7967   | 8515.4  | 8973.2    |
| 334 | 7368.95  | 7600   | 8008   | 8579.1  | 9018.375  |
| 335 | 7386.825 | 7625.5 | 8046   | 8634.4  | 9086.4    |
| 336 | 7397.975 | 7644.4 | 8084.5 | 8693.5  | 9140.075  |
| 337 | 7407     | 7669.4 | 8121   | 8753.3  | 9188.6    |
| 338 | 7432.7   | 7690.7 | 8158.5 | 8816.1  | 9267.8    |
| 339 | 7443.775 | 7719.6 | 8201   | 8867.3  | 9347.175  |
| 340 | 7461.675 | 7745   | 8237.5 | 8912.1  | 9399.15   |
| 341 | 7477.725 | 7769.3 | 8276   | 8967.5  | 9445.275  |
| 342 | 7484.975 | 7793   | 8318   | 9033.1  | 9492.275  |
| 343 | 7503.875 | 7813.7 | 8357.5 | 9077.4  | 9553.05   |
| 344 | 7538.575 | 7835.9 | 8398   | 9119.2  | 9601.225  |
| 345 | 7552.675 | 7863.6 | 8437   | 9174.2  | 9632.45   |
| 346 | 7559.95  | 7885.9 | 8479.5 | 9227.4  | 9697.325  |
| 347 | 7576.975 | 7909.8 | 8516   | 9275.1  | 9737.275  |
| 348 | 7585.975 | 7933.4 | 8554.5 | 9335.5  | 9809.125  |
| 349 | 7609.85  | 7963.9 | 8598.5 | 9395.6  | 9884.075  |
| 350 | 7623.975 | 7993.9 | 8635.5 | 9457.2  | 9966.025  |
| 351 | 7654.675 | 8027.9 | 8673.5 | 9520.5  | 10035.225 |
| 352 | 7669.775 | 8061.9 | 8712   | 9577.8  | 10099.575 |
| 353 | 7684.875 | 8101.9 | 8753   | 9657.7  | 10174.225 |
| 354 | 7698.925 | 8138.7 | 8792   | 9759.3  | 10243.5   |
| 355 | 7734.6   | 8179.9 | 8833.5 | 9839.6  | 10309.1   |
| 356 | 7747.75  | 8209.8 | 8876   | 9902.6  | 10393.85  |
| 357 | 7758.95  | 8239   | 8920.5 | 9967.1  | 10454.3   |
| 358 | 7775.825 | 8284.8 | 8970.5 | 10035.1 | 10527.275 |
| 359 | 7815.075 | 8327.6 | 9021   | 10157.6 | 10622.15  |
| 360 | 7918.45  | 8388.5 | 9084   | 10342.8 | 10719.3   |
| 361 | 7973.875 | 8459.6 | 9164.5 | 10591.5 | 10879.15  |
| 362 | 8059.875 | 8519.7 | 9240   | 10745.3 | 11024.65  |
| 363 | 8142.2   | 8595.8 | 9330   | 10836.1 | 11174.025 |
|     |          |        |        |         | 11324.1   |

---



**Table S3.** Species found with their ecological preferences. Based on [51,52,54].

| Taxa                                               | General Environment | Habitat | Trophic state | pH   | Nitrogen<br>Uptake Metabolism | Oxygen Requirements | Saprobity | Moisture |
|----------------------------------------------------|---------------------|---------|---------------|------|-------------------------------|---------------------|-----------|----------|
| <i>Amphora</i> sp.                                 | nd                  | B       | nd            | nd   | nd                            | nd                  | nd        | nd       |
| <i>Aulacoseira canadensis</i>                      | F                   | P       | nd            | nd   | nd                            | nd                  | nd        | nd       |
| <i>Aulacoseira crassipunctata</i>                  | F                   | P       | nd            | nd   | nd                            | nd                  | nd        | nd       |
| <i>Aulacoseira italica</i>                         | F/B                 | P-B     | ME            | C    | 2                             | 2                   | βM        | 3        |
| <i>Caloneis</i> sp.                                | nd                  | B       | nd            | nd   | nd                            | nd                  | nd        | nd       |
| <i>Caloneis</i> sp. 4                              | nd                  | B       | nd            | nd   | nd                            | nd                  | nd        | nd       |
| <i>Cavinula cocconeiformis</i>                     | F/T                 | P-B     | OM            | C    | 1                             | 1                   | O         | 3        |
| <i>Cavinula cocconeiformis</i> f. <i>elliptica</i> | F/T                 | nd      | nd            | nd   | nd                            | nd                  | nd        | nd       |
| <i>Cavinula davisiae</i>                           | F/T                 | B       | O             | C    | nd                            | nd                  | nd        | nd       |
| <i>Cavinula pseudoscutiformis</i>                  | F/T                 | B       | ME            | Alph | 1                             | 2                   | βM        | 3        |
| <i>Chamaepinnularia krookii</i>                    | F/T                 | nd      | nd            | C    | nd                            | nd                  | O         | 3        |
| <i>Chamaepinnularia krookii</i> formis             | U                   | nd      | nd            | C    | nd                            | nd                  | O         | 3        |
| <i>Cocconeis</i> cf. <i>californica</i>            | M/F                 | B       | nd            | nd   | nd                            | nd                  | nd        | nd       |
| <i>Cocconeis</i> cf. <i>islandica</i>              | M                   | B       | nd            | nd   | nd                            | nd                  | nd        | nd       |
| <i>Cocconeis</i> cf. <i>scutellum</i>              | M/B                 | B       | nd            | nd   | nd                            | nd                  | nd        | nd       |
| <i>Cocconeis costata</i>                           | M                   | B       | nd            | nd   | nd                            | nd                  | nd        | nd       |
| <i>Cocconeis placentula</i> s.l.                   | F/B                 | B       | H             | Alph | 2                             | 3                   | βM        | 2        |
| <i>Coscinodiscus</i> sp.                           | nd                  | nd      | nd            | nd   | nd                            | nd                  | nd        | nd       |
| <i>Cymbella mexicana</i>                           | F                   | B       | nd            | nd   | nd                            | nd                  | nd        | nd       |
| <i>Cymbopleura</i> sp.                             | nd                  | B       | nd            | nd   | nd                            | nd                  | nd        | nd       |
| <i>Diadesmis mochalovae</i>                        | F/T                 | B       | nd            | Acph | nd                            | nd                  | nd        | nd       |
| <i>Diadesmis</i> sp.                               | nd                  | nd      | nd            | nd   | nd                            | nd                  | nd        | nd       |
| <i>Diploneis interrupta</i>                        | B/F                 | B       | nd            | Alb  | nd                            | nd                  | nd        | 3        |
| <i>Diploneis krammeri</i>                          | F                   | B       | O             | Alb  | nd                            | nd                  | nd        | nd       |
| <i>Diploneis ovalis</i>                            | F/B                 | B       | nd            | Alph | 1                             | 1                   | O         | 4        |
| <i>Diploneis pseudovalis</i>                       | B                   | B       | nd            | nd   | nd                            | nd                  | nd        | nd       |
| <i>Encyonema minutum</i>                           | F/B                 | B       | OM            | C    | nd                            | nd                  | nd        | nd       |
| <i>Encyonema silesiacum</i>                        | F/B                 | B       | OE            | C    | 2                             | 3                   | αM        | 1        |

|                                        |       |     |    |       |    |    |    |    |
|----------------------------------------|-------|-----|----|-------|----|----|----|----|
| <i>Encyonema</i> sp.                   | nd    | nd  | nd | nd    | nd | nd | nd | nd |
| <i>Encyonopsis</i> sp.                 | nd    | B   | nd | nd    | nd | nd | nd | nd |
| <i>Epithemia sorex</i>                 | F/B   | B   | E  | Alb   | 1  | 2  | βM | 2  |
| <i>Eunotia</i> cf. <i>bidens</i>       | F     | B   | OM | Acph  | 1  | 1  | O  | 3  |
| <i>Eunotia curtagrunowii</i>           | F     | B   | nd | nd    | nd | nd | nd | nd |
| <i>Eunotia diadema</i>                 | F     | B   | O  | Acph  | 1  | 1  | O  | 3  |
| <i>Eunotia minor</i>                   | F     | B   | nd | Acph  | nd | nd | O  | 4  |
| <i>Eunotia</i> sp.                     | F     | B   | nd | nd    | nd | nd | nd | nd |
| <i>Eunotia tetraodon</i>               | F/T   | B   | O  | Acph  | 1  | 1  | O  | 3  |
| <i>Fragilaria mesolepta</i>            | F/B   | P-B | nd | Alph  | nd | nd | nd | nd |
| <i>Frustulia</i> sp.                   | F     | B   | nd | Acb   | nd | nd | nd | nd |
| <i>Grammatophora</i> sp.               | M     | nd  | nd | nd    | nd | nd | nd | nd |
| <i>Hantzschia amphioxys</i>            | F/B/T | B   | OE | C     | 2  | 2  | αM | 4  |
| <i>Humidophila laevis</i>              | F/T   | B   | nd | Acph  | nd | nd | nd | nd |
| <i>Luticola arctica</i>                | F/T   | B   | nd | nd    | nd | nd | nd | 3  |
| <i>Luticola</i> cf. <i>mutica</i>      | B/F/T | B   | E  | C/Acb | 2  | 1  | αM | 4  |
| <i>Luticola</i> cf. <i>gaussii</i>     | F/T   | B   | nd | nd    | nd | nd | nd | nd |
| <i>Navicula eidrigiana</i>             | B/F   | B   | nd | nd    | nd | nd | nd | nd |
| <i>Navicula pseudotenelloides</i>      | F     | B   | nd | nd    | nd | nd | nd | nd |
| <i>Navicula rhynchocephala</i>         | F/B   | B   | OE | Alph  | 2  | 4  | βM | 2  |
| <i>Navicula</i> sp.                    | nd    | B   | nd | nd    | nd | nd | nd | nd |
| <i>Neidium</i> sp.                     | nd    | B   | nd | nd    | nd | nd | nd | nd |
| <i>Pinnularia arkadii</i>              | F     | B   | nd | nd    | nd | nd | nd | nd |
| <i>Pinnularia borealis</i>             | F/B/T | B   | OM | C     | 2  | 1  | βM | 4  |
| <i>Pinnularia</i> cf. <i>islandica</i> | F     | B   | O  | nd    | nd | nd | nd | nd |
| <i>Pinnularia</i> cf. <i>renata</i>    | F/T   | B   | nd | nd    | nd | nd | nd | nd |
| <i>Pinnularia divergens</i>            | F     | B   | O  | C     | nd | nd | O  | 3  |
| <i>Pinnularia inconstans</i>           | F     | B   | nd | nd    | nd | nd | nd | nd |
| <i>Pinnularia intermedia</i>           | F     | nd  | OE | C     | nd | nd | O  | 4  |
| <i>Pinnularia lagerstedtii</i>         | F     | B   | O  | C     | nd | nd | O  | 4  |
| <i>Pinnularia lata</i>                 | F/T   | B   | O  | Acph  | nd | 1  | O  | 5  |
| <i>Pinnularia obscura</i>              | F/B   | B   | nd | C     | 1  | 1  | O  | 4  |

|                                                 |     |     |    |      |    |    |             |    |
|-------------------------------------------------|-----|-----|----|------|----|----|-------------|----|
| <i>Pinnularia pseudoparva</i>                   | F   | B   | nd | nd   | nd | nd | nd          | nd |
| <i>Pinnularia</i> sp. 1                         | nd  | B   | nd | nd   | nd | nd | nd          | nd |
| <i>Pinnularia</i> sp. 4                         | nd  | B   | nd | nd   | nd | nd | nd          | nd |
| <i>Pinnularia</i> sp. 5                         | nd  | B   | nd | nd   | nd | nd | nd          | nd |
| <i>Pinnularia viridiformis</i>                  | F   | B   | nd | nd   | nd | nd | nd          | nd |
| <i>Placoneis</i> sp.                            | nd  | B   | nd | nd   | nd | nd | nd          | nd |
| <i>Planothidium frequentissimum</i>             | F/B | B   | OE | Alph | 2  | 3  | $\alpha$ MP | nd |
| <i>Platessa lutheri</i>                         | F/T | B   | O  | Acph | 1  | 1  | O           | 4  |
| <i>Psammothidium</i> sp.                        | F   | B   | nd | nd   | nd | nd | nd          | nd |
| <i>Pseudostauroforma</i> sp.                    | nd  | nd  | nd | nd   | nd | nd | nd          | nd |
| <i>Pseudostaurosira brevistriata</i>            | F/B | P-B | OE | Alph | 1  | 1  | O           | 2  |
| <i>Rexlowea navicularis</i>                     | F   | B   | nd | nd   | nd | nd | nd          | nd |
| <i>Stauroforma exiguiformis</i>                 | F   | B   | nd | nd   | nd | nd | nd          | nd |
| <i>Stauroneis</i> sp.                           | F   | B   | nd | nd   | nd | nd | nd          | nd |
| <i>Staurosira construens</i>                    | F/B | P-B | ME | Alph | 1  | 1  | $\beta$ M   | 1  |
| <i>Staurosira construens</i> var. <i>venter</i> | F/B | P-B | ME | Alph | 2  | 1  | $\beta$ M   | 1  |
| <i>Staurosira construens</i> var. <i>exigua</i> | F/B | P-B | ME | Alph | 2  | 1  | O           | 1  |
| <i>Staurosirella lapponica</i>                  | F/B | P-B | nd | Alph | nd | nd | nd          | 2  |
| <i>Staurosirella martyi</i>                     | F   | B   | nd | nd   | nd | nd | nd          | nd |
| <i>Staurosirella minuta</i>                     | F   | B   | nd | nd   | nd | nd | nd          | nd |

Note: nd – no data. Abbreviations meaning for columns: **General environment:** F– fresh, B – brackish, M – marine, T – terrestrial, U – ubiquitous species; **Habitat:** B – benthos, P – plankton; **Trophic state:** O – oligotraphentic, OM – oligo-mesotraphentic, ME – meso-eutraphentic, E – eutraphentic, H – hypereutraphentic, OE – oligo-to eutraphentic (hypereutraphentic); **pH:** Acb – acidobiontic, Acph – acidophilous, C – circumneutral, Alph – alkaliphilous, Alb – Alkalibiontic; **Nitrogen uptake metabolism:** 1 – nitrogen-autotrophic taxa, tolerating very small concentrations of organically bound nitrogen, 2 – nitrogen autotrophic taxa, tolerating elevated concentrations of organically bound nitrogen; **Oxygen requirements:** 1 – continuously high (about 100% saturation), 2 – fairly high (above 75% saturation), 3 – moderate (above 50% saturation), 4 – low (above 30% saturation); **Saprobity:** O – oligosaprobous,  $\beta$ M –  $\beta$ -mesosaprobous,  $\alpha$ M –  $\alpha$ -mesosaprobous,  $\alpha$ MP –  $\alpha$ -meso-/polysaprobous; **Moisture:** 1 – Never, or only very rarely, occurring outside water bodies, 2 – mainly occurring in water bodies, sometimes on wet places, 3 – mainly occurring in water bodies, also rather regularly on wet and moist places, 4 – mainly occurring on wet and moist or temporarily dry places, 5 – nearly exclusively occurring outside water bodies.
